# Supplementary material
Source: Springer Nature journal article supplement (https://www.springermedizin.de/resource/supplementary/12974_2004_23_MOESM3_ESM.pdf/9600016)

A

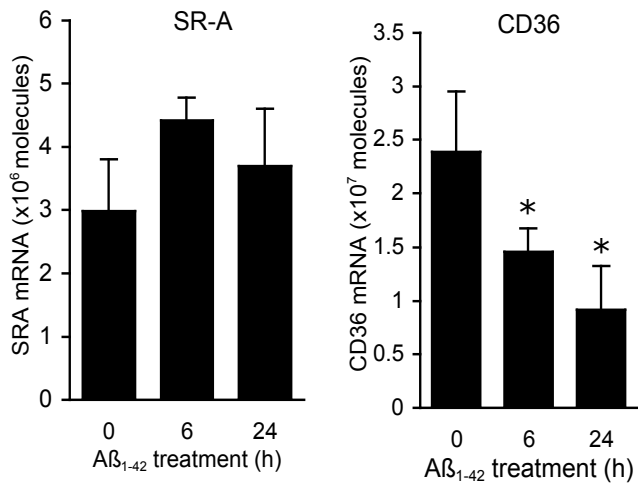

B

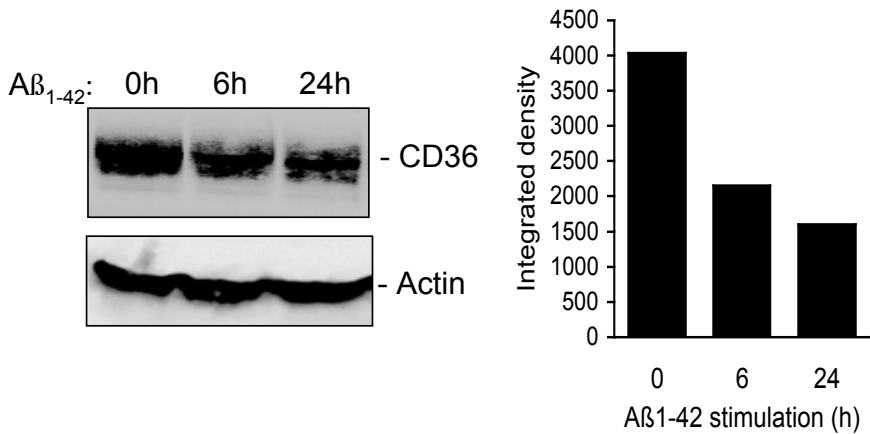

Supplement: MOESM3 [file 9600016]
